# Supplementary material
Source: PubMed Central journal article supplement (PMC6275355)
Supplement: zam024188894s1.pdf [file zam024188894s1.pdf]

**TABLE S1** Read numbers of *amoA/pmoA* genes of AOA, AOB, comammox and MOB in various environmental samples from metagenomic or metatranscriptomic datasets in the NCBI SRA database. (Excel file format)

**TABLE S2** Read numbers of *amoA/pmoA* genes of AOA, AOB, comammox and MOB in marine samples from metagenomic or metatranscriptomic datasets in the CAMERA database. (Excel file format)

**TABLE S3** Read numbers of comammox and AOB in 18 different environmental samples (amplification failed for the other three of the 21 samples) analyzed via partial nested PCR amplification of the comammox-specific *amoA* gene.

| Sample type         | No. of reads | clade A   |           | clade B | AOB   | Others |
|---------------------|--------------|-----------|-----------|---------|-------|--------|
|                     |              | clade A.1 | clade A.2 |         |       |        |
| <b>Soil</b>         |              |           |           |         |       |        |
| Dry land soil       | 57722        | 129       | 3626      | 125     | 51985 | 1857   |
| Coal mine soil      | 17448        | 100       | 2334      | 10      | 13303 | 1701   |
| Landfill soil       | 99747        | 5478      | 2111      | 182     | 91829 | 147    |
| Paddy soil          | 147776       | 16311     | 11990     | 23340   | 96103 | 32     |
| Plateau soil        | 20440        | 4715      | 143       | 13102   | 2477  | 3      |
| Forest soil         | 41931        | 86        | 1368      | 38149   | 2325  | 3      |
| <b>Sediment</b>     |              |           |           |         |       |        |
| Tidal flat sediment | 6853         | 5193      | 1126      | 10      | 522   | 2      |
| Saltmarsh sediment  | 20498        | 10483     | 6982      | 683     | 2319  | 31     |
| Coastal sediment    | 36591        | 18909     | 8926      | 39      | 8714  | 3      |
| River sediment      | 20132        | 7933      | 2930      | 7657    | 1609  | 3      |
| Lake sediment       | 198760       | 175734    | 12033     | 2404    | 8526  | 63     |
| <b>Sludge</b>       |              |           |           |         |       |        |
| Activated sludge    | 17130        | 372       | 43        | 13      | 16699 | 3      |
| Anaerobic sludge    | 19194        | 13027     | 896       | 14      | 5247  | 10     |
| <b>Water</b>        |              |           |           |         |       |        |
| Tap water           | 27302        | 3302      | 23663     | 27      | 305   | 5      |
| Coastal water       | 29191        | 25144     | 3911      | 63      | 67    | 6      |
| River water         | 22134        | 11156     | 8466      | 182     | 2324  | 6      |
| Lake water          | 4958         | 4252      | 341       | 7       | 47    | 311    |
| <b>Leaf</b>         |              |           |           |         |       |        |
| Leaf surface        | 28839        | 13899     | 7211      | 718     | 6991  | 20     |

**TABLE S4** The 30 major OTUs ( $\geq 0.7\%$ ) of the comammox *amoA* gene with 90% similarity cutoff for each environment sample. Please see Figure 3 for the phylogeny of these major OTUs. (Excel file format)

**TABLE S5** Amino acid similarity matrix of different comammox OTUs identified with a 90% similarity cutoff. (Excel file format)

**TABLE S6** Diversity indices with 97% or 90% similarity cutoffs for comammox, AOB and AOA *amoA* gene sequences in each of the 12 environmental samples after rarifying read numbers to 1900 for each sample. (Excel file format)

**TABLE S7** Characteristics of various environmental samples analyzed in this study

| Sample ID | Sample name         | Sample type | Location                                                  | Longitude and latitude | Sample description                                                    | Sampling time | pH             | NO <sub>3</sub> <sup>-</sup> (μmol/g) | NH <sub>3</sub> (μmol/g) |
|-----------|---------------------|-------------|-----------------------------------------------------------|------------------------|-----------------------------------------------------------------------|---------------|----------------|---------------------------------------|--------------------------|
| 1         | Dry land soil       | soil        | Chongming Island, Shanghai, China (Yangtze River estuary) | 121°36' E, 31°36' N    | 0-5 cm of surface soil planted with wheat                             | Oct. 2013     | - <sup>a</sup> | -                                     | -                        |
| 2         | Coal mine soil      | soil        | Shanxi Province, China (the Loess Plateau)                | 109°35' E, 38°26' N    | 0-5 cm of surface soil covered by grass near the operating fan outlet | May 2012      | 7.9            | 0.10                                  | 0.00                     |
| 3         | Landfill soil       | soil        | Disused municipal solid waste landfill, Shanghai, China   | 121°52' E, 31° 02' N   | 0-5 cm of surface soil planted with shrubs                            | Apr. 2011     | 7.1            | 4.22                                  | 0.50                     |
| 4         | Paddy soil          | soil        | Chongming Island, Shanghai, China                         | 121°36' E, 31°36' N    | 0-5 cm of surface soil planted with rice                              | Oct. 2011     | 7.64           | 0.70                                  | 1.16                     |
| 5         | Glacier soil        | soil        | Xinjiang Province, China                                  | 86°50' E, 43°07' N     | 0-5 cm of surface soil covered by ice                                 | Aug. 2009     | -              | -                                     | -                        |
| 6         | Plateau soil        | soil        | Tibet, China (high elevation)                             | 94°25' E, 29°38' N     | 0-5 cm of surface soil planted with grass                             | Aug. 2009     | 8.7            | 0.09                                  | 0.13                     |
| 7         | Forest soil         | soil        | Forest Park, Shanghai, China                              | 121°33' E, 31°19' N    | 0-5 cm of surface soil planted with deciduous trees                   | Oct. 2013     | 8.1            | 2.08                                  | 0.39                     |
| 9         | Tidal flat sediment | sediment    | Chongming Island, Shanghai, China                         | 121°59' E, 31°29' N    | 0-5 cm of surface sediment (no plant)                                 | Oct. 2013     | 7.32           | 0.09                                  | 0.05                     |
| 10        | Saltmarsh sediment  | sediment    | Chongming Island, Shanghai, China                         | 121°57' E, 31°31' N    | 0-5 cm of surface sediment planted with reed at intertidal region     | Oct. 2013     | 7.6            | 0.02                                  | 0.21                     |
| 11        | Coastal sediment    | sediment    | East China Sea, China (Near Shanghai)                     | 122°07' E, 31° 02' N   | 0-10 cm of surface sediment at 20 m of water depth                    | Jul. 2011     | 7.45           | 0.03                                  | 0.07                     |

|    |                     |                |                                                                  |                          |                                                                                             |           |      |       |       |
|----|---------------------|----------------|------------------------------------------------------------------|--------------------------|---------------------------------------------------------------------------------------------|-----------|------|-------|-------|
| 12 | River sediment      | sediment       | Lower reach of Yangtze River, Shanghai, China                    | 121°45' E,<br>31°28' N   | 0-5 cm of surface sediment at 0.5 m of water depth                                          | Oct. 2013 | 7.6  | 3.88  | 0.00  |
| 13 | Lake sediment       | sediment       | Ping Lake, Zhejiang Province, China (Middle-Lower Yangtze Plain) | 120°01' E,<br>30°41' N   | 0-5 cm of surface sediment at 2 m of water depth                                            | Aug. 2012 | 7.5  | 9.66  | 1.37  |
| 14 | Wetland sediment    | sediment       | Songduo wetland, Tibet, China (Tibetan Plateau)                  | 100°35' E,<br>32°15' N   | 0-5 cm of surface sediment of plateau wetland covered by grass                              | Aug. 2009 | 7.46 | 20.78 | 5.65  |
| 15 | Hot spring sediment | sediment       | Riduo hot spring, Tibet, China (Tibetan Plateau)                 | 99°40' E, 35°13' N       | 0-5 cm of surface sediment at 60°C                                                          | Aug. 2009 | 7.84 | 0.35  | 0.00  |
| 16 | Activated sludge    | sludge         | Hongkou Qu, Shanghai, China                                      | 121°29' E,<br>31°17' N   | Aeration tank of a sewage treatment plant                                                   | Jun. 2009 | 7.52 | 0.24  | 16.06 |
| 17 | Anaerobic sludge    | sludge         | Brewage wastewater treatment plant, Shanghai, China              | 121°33' E,<br>31° 04' N  | Recycling sludge from anaerobic digestion plant                                             | Jun. 2009 | 7.6  | 1.10  | 13.87 |
| 18 | Tap water           | water (filter) | Fudan University, Shanghai, China                                | 121° 31' E,<br>31° 18' N | 1 L water filtered through a 0.22- $\mu$ m nitrocellulose filter                            | Sep. 2015 | 7.5  | 0.00  | 0.00  |
| 19 | Coastal water       | water (filter) | Coast of East China Sea, China (near Zhejiang Province)          | 122° 13' E,<br>28° 45' N | 1 L water filtered through a 0.22- $\mu$ m nitrocellulose filter                            | Jul. 2011 | -    | -     | -     |
| 20 | River water         | water (filter) | Lower reach of Yangtze River, Shanghai, China                    | 121°45' E,<br>31°28' N   | 0.5 L surface water filtered through a 0.22- $\mu$ m nitrocellulose filter                  | Oct. 2013 | -    | -     | -     |
| 21 | Lake water          | water (filter) | Ping Lake, Zhejiang Province, China (Middle-Lower Yangtze Plain) | 120°01' E,<br>30°41' N   | 1 L of 0-5 cm surface water filtered through a 0.22- $\mu$ m nitrocellulose filter          | Aug. 2012 | -    | -     | -     |
| 22 | Leaf surface        | water (filter) | Pond in Fudan University, Shanghai, China                        | 121°29' E,<br>31°18' N   | 1 L sterile water shaken with 3 pieces of lotus leaves (~ 0.3 m <sup>2</sup> total surface) | May, 2011 | -    | -     | -     |

and filtered through a 0.22- $\mu$ m  
nitrocellulose filter

---

<sup>a</sup> -: not determined.

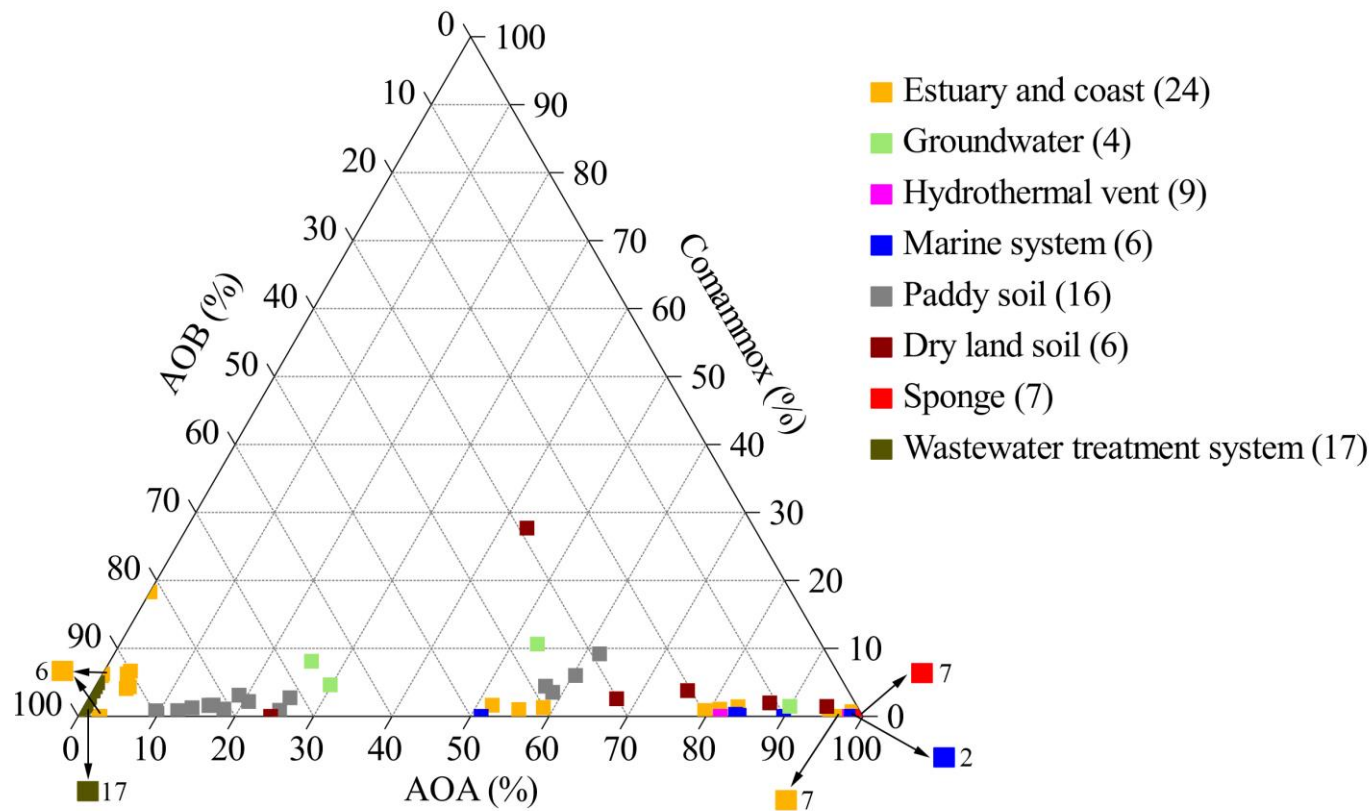

**FIG S1** A ternary plot of the relative abundances of comammox, AOB, and AOA in 90 metatranscriptomic datasets of different environmental samples from the NCBI SRA database with *amoA* gene sequence read numbers of at least 30. The numbers directed by arrows in the figure indicate the numbers of overlapping specific color squares. The numbers in parentheses denote the numbers of datasets used in this analysis for specific environmental types. For detailed information on each of the datasets, please see Table S1.

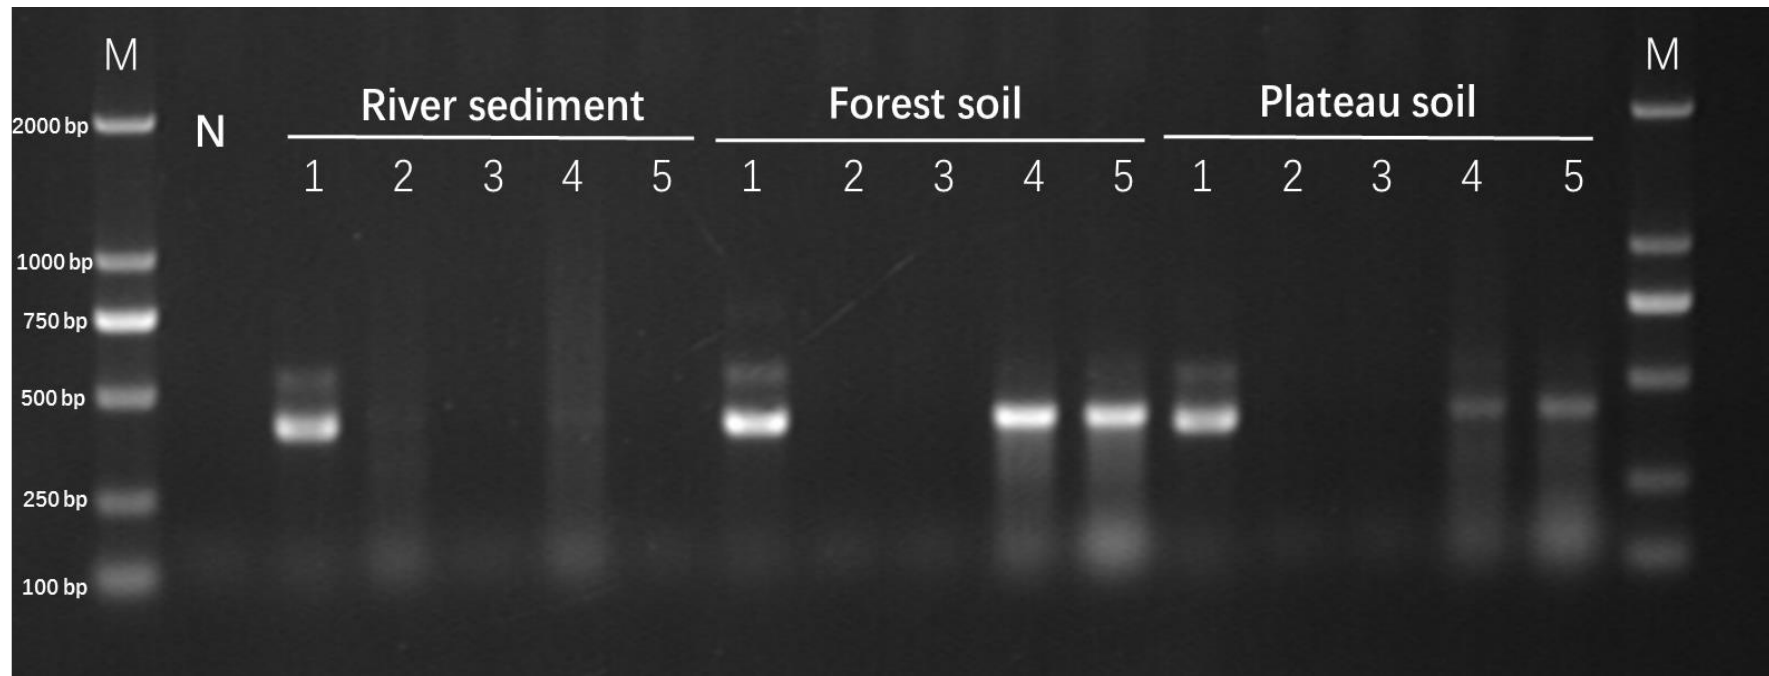

**FIG S2** Gel image of different PCR products from river sediment, forest soil, and plateau soil samples. Lanes M and N indicate the marker and negative control for partial nested PCR, respectively, and lanes 1-5 indicate the PCR product using different methods with the different samples mentioned above. Lane 1: partial nested PCR; Lane 2: PCR with degenerate primers for clade A; Lane 3: PCR with mixed primers for clade B; Lane 4: PCR with degenerate primers for clade B; Lane 5: PCR with mixed primers for clade B. The PCR primers and amplification conditions for Lane 1 are described in the Materials and methods section, and those for Lanes 2-5 are described in Pjevac *et al.* (Pjevac et al., Front Microbiol 8:e1508, 2017).



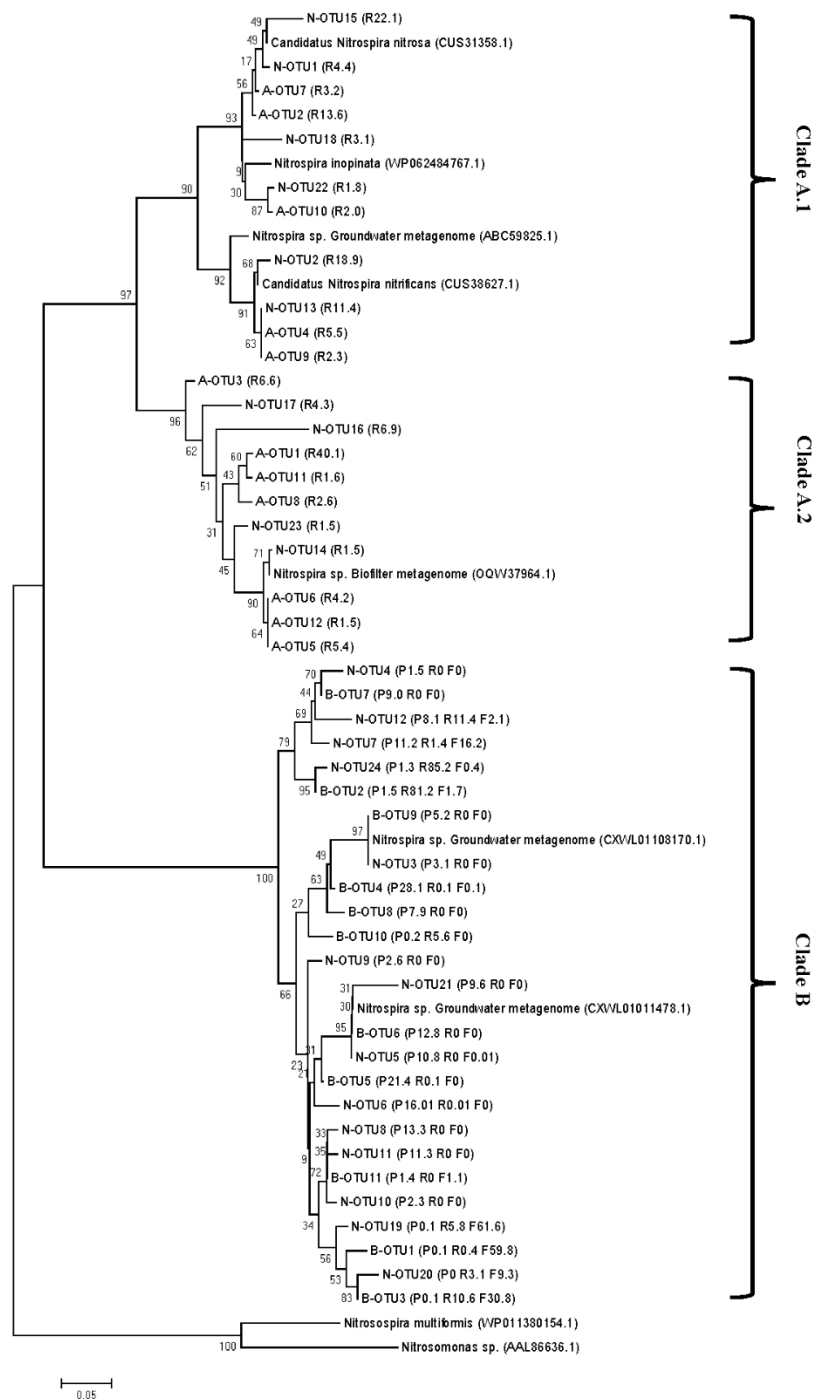

**FIG S3** Neighbor-joining phylogenetic tree for comammox *AmoA* retrieved by partial nested PCR developed in this study and *Nitrospira amoA*-specific degenerate primers developed by Pjevac *et al.* (Pjevac *et al.*, Front Microbiol 8:e1508, 2017). Characters “A”, “B” and “N” in the OTU names indicate the degenerate primers for clade A, degenerate primers for clade B and primers for partial nested PCR, respectively. Characters “P”, “R” and “F” in the parentheses indicate plateau soil, river sediment and forest soil, respectively. The number after the sample symbol character indicates the percentage of the sequences in this OTU of this sample compared to the total sequence number retrieved using the same PCR primers for this sample (from all OTUs).

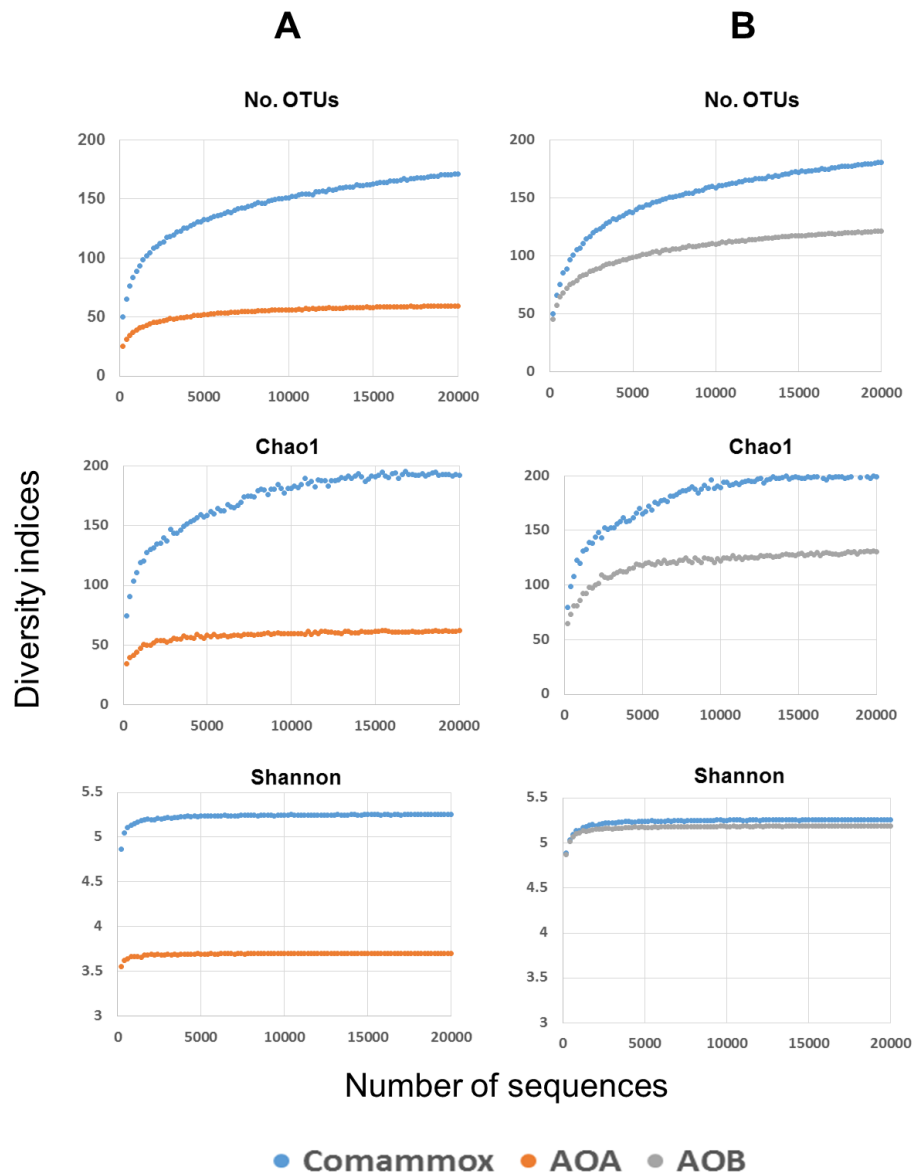

**FIG S4** Rarefaction curves of the number of OTUs, the Chao1 estimator and the Shannon index using OTU similarity thresholds of 90% with same region of the *amoA* gene for comparisons of comammox and AOB (A) and comammox and AOA (B) based on a combination of 1900 randomly selected reads from each of the 12 different environmental samples.

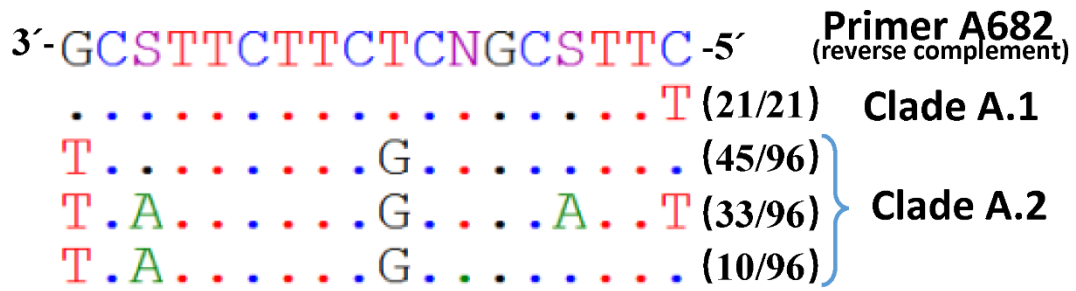

**FIG S5** Evaluation of the coverage of primer A682 for comammox bacteria. The sequences were obtained from seven clone libraries of comammox *amoAB* genes amplified using the THDP-PCR method from tidal flat sediment, rice soil, forest soil, leaf surface, tap water, sea water, and activated sludge samples. The data in parentheses indicate the frequency of each sequence in the total sequence sets of clade A.1 and clade A.2.
